# Supplementary material
Source: PubMed Central journal article supplement (PMC9097748)
Supplement: Appendix_A_Final_Database_Search_Thread.pdf [file Appendix_A_Final_Database_Search_Thread.pdf]

## Appendix A: Final Database Search Thread

((("contract" or "contracts") not ("contractility" or "contraction" or "contractions" or "contracture" or "contractures" or "contractor" or "contractors" or "muscle" or "muscles" or "muscular" or "bladder" or "bladders" or "uterus" or "uterine" or "legal" or "employer" or "employers" or "employee" or "employees" or "employment" or "outsource" or "outsourcing" or "manufacture" or "manufacturer" or "manufacturing" or "medicaid" or "medicare" or "managed care" or "commissioning" or "commission" or "commissions" or "management contract" or "contract management" or "insurance" or "new contract" or "funding" or "funded" or "social contract" or "social contracts" or "economic" or "economics" or "economy" or "capitation" or "capitated" or "government contract" or "health plan" or "risk contract" or "hospital" or "hospitals" or "surgical" or "contract services" or "contract service" or "services contract" or "service contract" or "services contracts" or "service contracts" or "industry" or "contract research" or "PES contracts" or "PES contract" or "junior contract" or "junior doctor contract" or "contract negotiation" or "contract negotiations" or "consultant contract" or "consultant contracts" or "junior doctor" or "junior doctors" or "cell" or "gene" or "genes" or "genetic" or "genetics" or "animal" or "animals" or "farm" or "farmer" or "farmers" or "farms" or "farming" or "companies" or "company" or "cyto contracts" or "cyto contract" or "supply contract" or "supply contracts" or "purchase contract" or "purchase contracts" or "contracting out" or "contract out" or "school" or "schools" or "classroom" or "classrooms" or "organizational" or "learning contract" or "learning contracts" or "hospice" or "library" or "libraries" or "vendor contract" or "vendor contracts" or "collective agreement" or "collective agreements" or "GP contract" or "copyright" or "dental" or "dentist" or "dentists" or "dentistry" or "criminal" or "parole" or "parolee" or "parolees" or "finance" or "athlete" or "athletes" or "corporate" or "corporation" or "corporations" or "supply chain" or "supply chains" or "welfare" or "international" or "jail" or "jails" or "prison" or "prisons" or "career" or "technology" or "student" or "students" or "worker" or "workers" or "consultant" or "consultants" or "faculty" or "staff" or "market" or "markets" or "preceptor" or "buyer" or "buyers" or "seller" or "sellers")) not animals/
