# Supplementary material
Source: PubMed Central journal article supplement (PMC9097748)
Supplement: Appendix_C_Data_Extraction_Form.pdf [file Appendix_C_Data_Extraction_Form.pdf]

## Appendix C: Data Extraction Form

| Reference | Author              | Journal                                         | Year | Country | Type of Study              | Chronic Condition                           | Setting                                 | Population                             | Parties                                              | Name of Contract                         | Purpose of Intervention/ Contract                                            | How Developed                  | Training | Co-Intervention | Follow-Up Duration | Contract Reviewed | Patient Input | Elements of Contract                                                                              | Incentives | Goals Discussed | Health Behaviour Theory |
|-----------|---------------------|-------------------------------------------------|------|---------|----------------------------|---------------------------------------------|-----------------------------------------|----------------------------------------|------------------------------------------------------|------------------------------------------|------------------------------------------------------------------------------|--------------------------------|----------|-----------------|--------------------|-------------------|---------------|---------------------------------------------------------------------------------------------------|------------|-----------------|-------------------------|
| (7)       | Bernstein, E. et al | Academic Emergency Medicine                     | 2009 | USA     | RCT                        | marijuana                                   | emergency department                    | adolescent, smoker                     | patient, peer educator                               | contract                                 | alter behavior                                                               | unknown                        | unknown  | yes             | 1 year             | yes               | yes           | unknown                                                                                           | yes        | unknown         | unknown                 |
| (8)       | Blokland, E. et al  | Health, Education & Behavior                    | 2009 | Holland | longitudinal study         | tobacco                                     | school, home                            | adolescent                             | patient, guardian                                    | no-smoking agreement                     | alter behavior, interpersonal (improve communication)                        | unknown                        | unknown  | No              | 2 years            | unknown           | unknown       | unknown                                                                                           | unknown    | unknown         | unknown                 |
| (46)      | Bloom, P. et al     | Journal of the American Geriatrics Society      | 2010 | USA     | pre and post intervention  | sedentary                                   | primary care clinic                     | geriatric                              | patient, health care provider                        | physical activity contract               | alter behavior, care process (facilitate counseling), alter health indices   | previously presented framework | unknown  | yes             | 8 weeks            | unknown           | yes           | activity prescription, instructions, activity suggestions, specific instructions (modifications)  | unknown    | yes             | unknown                 |
| (33)      | Born, C. et al      | BMC Psychiatry                                  | 2015 | Germany | retrospective chart review | anorexia nervosa                            | inpatient unit                          | AN patients                            | patient, health care provider                        | contract                                 | alter health indices, motivation, alter behavior                             | unknown                        | unknown  | yes             | 20 weeks           | unknown           | no            | rules of behavior, types of therapy being offered, rewards, restrictions                          | unknown    | unknown         | unknown                 |
| (73)      | Binkley, C.J. et al | Evaluation and program planning                 | 2014 | USA     | pre and post intervention  | intellectual and developmental disabilities | community                               | caregivers                             | guardian, dental hygienist or principal investigator | behavioral contract                      | alter beliefs (self-efficacy, alter behavior (support), alter health indices | unknown                        | unknown  | yes             | 6 weeks            | yes               | no            | unknown                                                                                           | unknown    | unknown         | social cognitive theory |
| (74)      | Browne, A. et al    | Cambridge Quarterly of Healthcare Ethics        | 2003 | USA     | case report                | paraplegic                                  | outpatient clinic                       | 31yo male                              | patient, health care provider                        | contract                                 | commitment, alter behavior                                                   | unknown                        | unknown  | No              | 8 months           | unknown           | no            | behavior                                                                                          | yes        | unknown         | unknown                 |
| (70)      | Brown, B.L. et al   | Journal of acquired immune deficiency syndromes | 2011 | Malawi  | RCT                        | HIV                                         | outpatient clinic                       | HIV +, adult                           | patient, health care provider                        | contract referral                        | change behavior                                                              | unknown                        | unknown  | yes             | 2 weeks            | unknown           | no            | unknown                                                                                           | unknown    | unknown         | unknown                 |
| (34)      | Bryan, C.J. et al   | Journal of affective disorders                  | 2017 | USA     | RCT                        | suicidal                                    | emergency department, outpatient clinic | active duty U.S. Army personnel, adult | patient, health care provider                        | contract for safety, no-suicide contract | alter behavior, alter beliefs                                                | unknown                        | unknown  | yes             | 6 months           | unknown           | no            | one question: If you were to go home today, do you think you would be able to keep yourself safe? | unknown    | unknown         | unknown                 |

|      |                        |                                                          |      |        |                           |                                               |                     |                                        |                                         |                                        |                                                                                       |         |                   |     |          |         |         |                                                                                |         |         |                               |
|------|------------------------|----------------------------------------------------------|------|--------|---------------------------|-----------------------------------------------|---------------------|----------------------------------------|-----------------------------------------|----------------------------------------|---------------------------------------------------------------------------------------|---------|-------------------|-----|----------|---------|---------|--------------------------------------------------------------------------------|---------|---------|-------------------------------|
| (53) | Burkhardt, P. et al    | Journal of Nursing Scholarship                           | 2007 | USA    | RCT                       | asthma                                        | primary care        | adolescent                             | child, guardian, health care provider   | contingency contracting                | alter behavior, alter health indices                                                  | unknown | unknown           | yes | 16 weeks | unknown | no      | unknown                                                                        | unknown | unknown | social cognitive theory       |
| (35) | Callan, J. et al       | Journal of Psychosocial Nursing & Mental Health Services | 2009 | USA    | case report               | borderline personality disorder               | inpatient unit      | 42yo female                            | patient, guardian, health care provider | contract                               | alter behavior                                                                        | unknown | unknown           | yes | unknown  | unknown | no      | acceptable and unacceptable behavior, consequences associated with infractions | unknown | yes     | unknown                       |
| (54) | Charlson, M.E. et al   | Translational Behavioral Medicine                        | 2014 | USA    | RCT                       | coronary artery disease, asthma, hypertension | primary care clinic | patients, African American, adult      | unknown                                 | behavioral contract                    | alter beliefs (self-efficacy), alter behavior, alter health indices                   | unknown | unknown           | yes | 1 year   | unknown | yes     | what behavior, how often, when, how long                                       | unknown | yes     | unknown                       |
| (66) | Chassany, O. et al     | Journal of Rheumatology                                  | 2006 | France | RCT                       | osteoarthritis                                | primary care clinic | seniors                                | patient, health care provider           | patient contract, therapeutic contract | alter behavior, alter health indices                                                  | unknown | yes               | yes | 2 weeks  | unknown | yes     | unknown                                                                        | unknown | unknown | unknown                       |
| (77) | Chelminski, P.R. et al | BMC Health Services Research                             | 2005 | USA    | pre and post intervention | chronic non-cancer pain                       | primary care clinic | adult                                  | patient, health care provider           | medication contract, pain contract     | alter behavior, alter health indices                                                  | unknown | unknown           | yes | 3 months | unknown | no      | prescription conditions                                                        | unknown | unknown | unknown                       |
| (79) | Cho, M.K.              | Nursing & health sciences                                | 2012 | Korea  | RCT                       | renal dialysis                                | outpatient clinic   | adult                                  | patient, health care provider           | health contract                        | alter skills (self-care), alter behavior, alter health indices, interpersonal (nurse) | unknown | based on a theory | yes | 4 weeks  | yes     | yes     | goals, methods, expected rewards                                               | unknown | yes     | King's goal attainment theory |
| (82) | Claydon, B. et al      | Ophthalmic and Physiological Optics                      | 1997 | UK     | RCT                       | reduced vision (contact lens wearers)         | optometrist clinic  | adult                                  | patient, health care provider           | health care contract                   | alter behavior, knowledge, alter health indices                                       | unknown | unknown           | yes | 1 year   | unknown | unknown | unknown                                                                        | unknown | unknown | unknown                       |
| (47) | Cloutier, M. et al     | Journal of Pediatrics                                    | 2015 | USA    | RCT                       | obesity                                       | primary care clinic | children, Hispanic or African American | guardian, health care provider          | behavioral contract                    | alter behavior, alter health indices                                                  | unknown | yes               | yes | 1 year   | yes     | yes     | action plan                                                                    | unknown | yes     | unknown                       |
| (9)  | Crealey, G. et al      | Pharmacoeconomics                                        | 1998 | UK     | RCT                       | tobacco                                       | pharmacy            | adult                                  | patient, health care provider           | contract                               | care process (cost-effectiveness), alter behavior, alter beliefs/knowledge            | unknown | unknown           | yes | 2 years  | unknown | yes     | benefits, risks, stop date                                                     | unknown | unknown | unknown                       |

|      |                     |                                                  |      |           |                                             |                                           |                                        |           |                               |                                     |                                                                      |         |         |     |           |         |         |                                                                                                      |         |         |                         |
|------|---------------------|--------------------------------------------------|------|-----------|---------------------------------------------|-------------------------------------------|----------------------------------------|-----------|-------------------------------|-------------------------------------|----------------------------------------------------------------------|---------|---------|-----|-----------|---------|---------|------------------------------------------------------------------------------------------------------|---------|---------|-------------------------|
| (55) | Cruz, J. et al      | European Respiratory Journal                     | 2016 | Portugal  | RCT                                         | chronic obstructive pulmonary disease     | primary care clinic, outpatient clinic | adult     | patient, health care provider | health contract                     | alter behavior, alter health indices                                 | unknown | unknown | yes | 6 months  | yes     | yes     | behavior (long-term goal)                                                                            | unknown | yes     | social cognitive theory |
| (10) | Dallery, J. et al   | Journal of applied behavior analysis             | 2008 | USA       | RCT                                         | tobacco                                   | home                                   | adult     | patient, health care provider | deposit contract                    | alter behavior, alter health indices                                 | unknown | unknown | yes | 24 days   | unknown | no      | unknown                                                                                              | yes     | unknown | unknown                 |
| (11) | DeMarce, J.M. et al | Addictive Behaviours                             | 2008 | USA       | RCT                                         | substance abuse and psychiatric disorders | primary care clinic                    | adult     | patient, health care provider | behavioral continuing care contract | alter behavior                                                       | unknown | unknown | yes | 1 year    | unknown | unknown | abstinence rates                                                                                     | unknown | unknown | unknown                 |
| (67) | Desai P.M. et al    | American Journal of Health Behavior              | 2014 | USA       | RCT                                         | osteoarthritis                            | community                              | geriatric | patient, health care provider | negotiated follow-up contract       | alter behavior, alter beliefs (stage of change)                      | unknown | unknown | yes | 18 months | yes     | yes     | preferences, capability, opportunities, strategies for handling relapse, barriers, plan/requirements | unknown | yes     | unknown                 |
| (12) | Feeney, G. et al    | Australian and New Zealand Journal of Psychiatry | 2002 | Australia | non-randomized historical cohort comparison | alcohol                                   | outpatient clinic                      | adult     | patient, health care provider | contract                            | alter behavior                                                       | Unknown | unknown | yes | 12 weeks  | unknown | unknown | Unknown                                                                                              | unknown | unknown | social cognitive theory |
| (13) | Feeney, G. et al    | Australian and New Zealand Journal of Psychiatry | 2001 | Australia | non-randomized historical cohort comparison | alcohol                                   | outpatient clinic                      | adult     | patient, health care provider | contract                            | alter behavior                                                       | unknown | unknown | yes | 1 year    | unknown | unknown | unknown                                                                                              | unknown | unknown | unknown                 |
| (14) | Fishman, M.S. et al | Journal of pain and symptom management           | 2002 | USA       | retrospective chart review                  | chronic non-cancer pain                   | outpatient clinic                      | adult     | patient, health care provider | trilateral opioid contract          | care process (improve collaboration), alter behavior                 | unknown | unknown | No  | 10 months | unknown | no      | requirements for opioid usage, commitment, agreement on prescription                                 | unknown | unknown | unknown                 |
| (15) | Fleming, F.M. et al | The journal of family practice                   | 1999 | USA       | RCT                                         | alcohol                                   | primary care clinic                    | adult     | patient, health care provider | contract                            | alter behavior, alter care process (reduced acute care resource use) | unknown | unknown | yes | 1 year    | unknown | unknown | unknown                                                                                              | unknown | unknown | unknown                 |

|      |                        |                                                         |      |         |                                            |                                                     |                   |                        |                               |                                                                              |                                                                     |                                                    |         |     |            |         |         |                                                                                                                                         |         |         |                                                                                           |
|------|------------------------|---------------------------------------------------------|------|---------|--------------------------------------------|-----------------------------------------------------|-------------------|------------------------|-------------------------------|------------------------------------------------------------------------------|---------------------------------------------------------------------|----------------------------------------------------|---------|-----|------------|---------|---------|-----------------------------------------------------------------------------------------------------------------------------------------|---------|---------|-------------------------------------------------------------------------------------------|
| (36) | Foelsh, P.A. et al     | Psychotherapy in practice                               | 1998 | USA     | case report                                | borderline personality disorder                     | outpatient clinic | 43 years old female    | patient, health care provider | treatment contract                                                           | alter behavior                                                      | unknown                                            | unknown | No  | 1 year     | unknown | yes     | therapy arrangements, behavior for client that could interfere with therapy, client limits and expectations, therapist responsibilities | unknown | yes     | Kernberg's theory for transference-focused psychotherapy (unsure if specific to contract) |
| (16) | Gallucci, G. et al     | The Academy of Psychosomatic Medicine                   | 2001 | USA     | case report                                | hepatitis C, psychiatric disorders, substance abuse | outpatient clinic | 38yo female            | patient, health care provider | treatment contract                                                           | alter behavior, allow monitoring                                    | unknown                                            | unknown | No  | 3 months   | unknown | unknown | rationale, patient's commitment to compliance, treatment regimen, abstinence                                                            | unknown | unknown | unknown                                                                                   |
| (75) | Gonda-Kotani, C. et al | Journal of Prevention and Intervention in the Community | 2017 | USA     | ecological momentary study                 | physical disabilities                               | community         | adult                  | patient, health care provider | contingency contract                                                         | alter behavior                                                      | unknown                                            | unknown | yes | 3 months   | unknown | no      | rewards for adhering to self-monitoring                                                                                                 | yes     | unknown | unknown                                                                                   |
| (48) | Haber, D. et al        | The Gerontologist                                       | 2004 | USA     | post intervention study (completion rates) | sedentary                                           | community         | geriatric              | patient, health care provider | health contract calendar                                                     | alter behavior, alter beliefs (motivation, self-efficacy)           | unknown                                            | yes     | yes | 2.5 months | yes     | yes     | motivation (information), goal setting, social support, memory techniques, problem solving, specific exercise goals                     | unknown | yes     | social cognitive theory                                                                   |
| (78) | Hariharan, J. et al    | Journal of General Internal Medicine                    | 2007 | USA     | retrospective chart review                 | chronic non-cancer pain                             | outpatient clinic | adult                  | patient, health care provider | medication contract (agreement), provider-patient agreement, opioid contract | alter behavior                                                      | unknown                                            | yes     | yes | unknown    | unknown | no      | patient and physician responsibilities, diagnosis, prescription, conditions under which/not prescribed, drug screens                    | unknown | unknown | unknown                                                                                   |
| (37) | Hartmann, A. et al     | Psychotherapy Research                                  | 2007 | Germany | longitudinal study                         | anorexia nervosa                                    | inpatient unit    | adult                  | patient, health care provider | treatment contract                                                           | alter behavior, alter health indices                                | unknown                                            | unknown | yes | unknown    | unknown | no      | rate of weight gain, target weight, unclear if more included                                                                            | unknown | unknown | unknown                                                                                   |
| (49) | Heneman, K. et al      | Journal of the American Dietetic Association            | 2005 | USA     | RCT                                        | nutrition                                           | community         | poverty, female, adult | patient, health care provider | contract for change tool                                                     | alter behavior, alter beliefs (readiness for change, self-efficacy) | adapted from previous work, tested in focus groups | yes     | yes | 10 months  | unknown | yes     | goals, methods for achieving them                                                                                                       | unknown | yes     | behaviour modification model                                                              |

|      |                   |                                      |      |                 |                      |                                                                    |                     |                     |                                                                              |                                        |                                                                                |                         |         |     |             |         |     |                                                                                                                                 |         |         |                              |
|------|-------------------|--------------------------------------|------|-----------------|----------------------|--------------------------------------------------------------------|---------------------|---------------------|------------------------------------------------------------------------------|----------------------------------------|--------------------------------------------------------------------------------|-------------------------|---------|-----|-------------|---------|-----|---------------------------------------------------------------------------------------------------------------------------------|---------|---------|------------------------------|
| (56) | Hillman, H. et al | The Behavior Analyst Today           | 2009 | USA             | ABAC reversal design | asthma                                                             | home                | 30yo female         | patient, health care provider                                                | contingency contract                   | alter behavior                                                                 | unknown                 | yes     | yes | 9 months    | unknown | no  | prescription conditions                                                                                                         | yes     | unknown | unknown                      |
| (17) | Hovell, M. et al  | Nicotine & Tobacco Research          | 2009 | USA             | RCT                  | tobacco                                                            | community           | mothers             | patient, health care provider                                                | behavioral contracting                 | alter behavior                                                                 | unknown                 | unknown | yes | 18 months   | yes     | yes | short and long term goals for reducing exposure                                                                                 | yes     | yes     | behavioral-ecological model  |
| (71) | Hovell, M. et al  | American Journal of Public Health    | 2003 | USA             | RCT                  | latent tuberculosis infection                                      | community           | Latino, adolescents | patient, peer counsellor                                                     | contingency contracting                | alter behavior                                                                 | unknown                 | unknown | yes | 6-9 months  | unknown | no  | unknown                                                                                                                         | unknown | yes     | behavioural-ecological model |
| (68) | Hughes, S. et al  | American Journal of health Behaviour | 2010 | USA             | RCT                  | osteoarthritis                                                     | community           | geriatric           | patient, health care provider                                                | physical activity maintenance contract | alter behavior, alter health indices                                           | unknown                 | unknown | yes | 18 months   | unknown | yes | exercise prescription                                                                                                           | unknown | yes     | social cognitive theory      |
| (38) | Ijff, M. et al    | BMC Health Services Research         | 2007 | The Netherlands | RCT                  | depression                                                         | primary care clinic | adult               | patient, health care provider                                                | contract; treatment plan               | alter behavior/skills, care process (cost-effectiveness), alter health indices | used from another study | yes     | yes | 18 weeks    | yes     | yes | preferred treatment, alarming symptoms, maintenance of meds, stepped care                                                       | unknown | yes     | unknown                      |
| (18) | Jaffee, W. et al  | Harvard Review of Psychiatry         | 2009 | USA             | case report          | post-traumatic stress disorder, dissociation, substance dependence | community           | 15yo male           | patient and health care provider; patient, guardian and health care provider | behavioral contract                    | alter behavior                                                                 | unknown                 | unknown | yes | unknown     | yes     | no  | treatment, random screens, targets, positive reinforcers, negative consequences, responsibilities (patient, therapist, parents) | yes     | unknown | unknown                      |
| (50) | John, L. et al    | Journal of General Internal Medicine | 2011 | USA             | RCT                  | obesity                                                            | primary care clinic | Veterans, adults    | unknown                                                                      | deposit contract                       | alter behavior, alter health indices                                           | unknown                 | unknown | yes | 32-36 weeks | yes     | yes | unknown                                                                                                                         | yes     | yes     | behavioral economic s        |

|      |                        |                                                               |      |          |                            |                                                                                                     |                      |                        |                                         |                                                                                        |                                                                                                                                                |                                                                                 |         |     |           |         |     |                                                                                                     |         |         |                         |
|------|------------------------|---------------------------------------------------------------|------|----------|----------------------------|-----------------------------------------------------------------------------------------------------|----------------------|------------------------|-----------------------------------------|----------------------------------------------------------------------------------------|------------------------------------------------------------------------------------------------------------------------------------------------|---------------------------------------------------------------------------------|---------|-----|-----------|---------|-----|-----------------------------------------------------------------------------------------------------|---------|---------|-------------------------|
| (39) | Kanahara, S.           | International Journal of Behavioral and Consultative Medicine | 2010 | USA      | case report                | schizophrenia                                                                                       | community            | adult male, immigrant  | patient, guardian, health care provider | behavior contract                                                                      | alter beliefs (commitment), alter behavior, alter health indices, interpersonal (communication with family), care process (making it concrete) | from behavioral assessment                                                      | unknown | yes | unknown   | unknown | no  | treatment goals and expectations, target behaviors, rationales, patient and parent responsibilities | unknown | unknown | unknown                 |
| (57) | Kegler, M. et al       | American Journal of Public Health                             | 2016 | USA      | RCT                        | overweight/obesity                                                                                  | community            | adult, female          | patient, peer coach                     | behavioral contract, family contract                                                   | alter behavior                                                                                                                                 | healthy actions from a pilot study, refined by community advisory board members | unknown | yes | 1 year    | unknown | yes | 6 healthy actions                                                                                   | unknown | yes     | social cognitive theory |
| (58) | Kirschenbaum, D. et al | Obesity Research                                              | 2005 | USA      | longitudinal study         | obesity                                                                                             | community            | adolescent, low-income | patient, guardian, health care provider | behavioral contract                                                                    | alter behavior, alter health indices                                                                                                           | unknown                                                                         | unknown | yes | 3 months  | unknown | no  | parents and participants commitment to self-monitor diet and exercise                               | unknown | unknown | unknown                 |
| (19) | Knight, J. et al       | Journal of Psychiatric Practice                               | 2007 | USA      | retrospective chart review | mental and behavioral health problems including depression, bipolar, disruptive; also substance use | community            | physician, adult       | patient, health care provider           | mental and behavioral health or substance use disorders contract; monitoring contracts | alter behavior/skills                                                                                                                          | unknown                                                                         | unknown | yes | 2-5 years | yes     | no  | elements of treatment, self-reports, collateral reports, specified tx plan, medication if indicated | unknown | unknown | unknown                 |
| (72) | Kominski, G. et al     | Journal of Adolescent Health                                  | 2007 | USA      | RCT                        | latent tuberculosis infection                                                                       | public health clinic | adolescent             | patient, guardian                       | contingency contracting                                                                | alter behavior, care process (cost-effectiveness)                                                                                              | unknown                                                                         | unknown | yes | 6 months  | unknown | yes | tangibles and privileges for adolescent if compliant                                                | yes     | yes     | unknown                 |
| (20) | Kraft, D.              | Contemporary Hypnosis and Integrative Therapy                 | 2012 | UK?      | case report                | tobacco                                                                                             | community            | 33yo male              | patient, health care provider           | verbal contract                                                                        | alter behavior                                                                                                                                 | unknown                                                                         | unknown | yes | 1 year    | unknown | no  | verbal agreement to give up smoking                                                                 | unknown | unknown | unknown                 |
| (62) | Labhardt, N. et al     | Tropical Medicine and International Health                    | 2011 | Cameroon | RCT                        | hypertension and diabetes                                                                           | primary care clinic  | adult                  | patient, health care provider           | treatment contract                                                                     | alter behavior, alter health indices                                                                                                           | unknown                                                                         | yes     | yes | 1 year    | unknown | no  | process of therapy, commitment, nurse responsibilities                                              | yes     | unknown | unknown                 |

|      |                      |                                                              |      |                                                                      |                            |                  |                     |                    |                                         |                                         |                                               |                                       |         |     |          |         |     |                                                                                                     |         |         |         |
|------|----------------------|--------------------------------------------------------------|------|----------------------------------------------------------------------|----------------------------|------------------|---------------------|--------------------|-----------------------------------------|-----------------------------------------|-----------------------------------------------|---------------------------------------|---------|-----|----------|---------|-----|-----------------------------------------------------------------------------------------------------|---------|---------|---------|
| (21) | Lash, S. et al       | Psychology of addictive behaviors                            | 2007 | USA                                                                  | RCT                        | substance use    | outpatient clinic   | adult, Veteran     | patient, health care provider           | aftercare contract, behavioral contract | alter behavior                                | unknown                               | unknown | yes | 1 year   | yes     | no  | abstinence rates, commitment, exceptions, rewards, plans                                            | yes     | unknown | unknown |
| (22) | Lash, S. et al       | American Journal of Drug and Alcohol Abuse                   | 1998 | USA                                                                  | RCT                        | substance abuse  | outpatient clinic   | adult, Veteran     | patient, health care provider           | aftercare participation contract        | alter behavior                                | unknown                               | unknown | yes | 8 weeks  | unknown | yes | info on relapse rates, commit to a group, alternative plans optional                                | unknown | unknown | unknown |
| (23) | Lash, S. et al       | Journal of Substance Abuse Treatment                         | 2013 | USA                                                                  | RCT                        | substance use    | outpatient clinic   | adult, Veteran     | patient, health care provider           | behavioral contract                     | alter behavior, alter beliefs (motivation)    | informed from prior studies           | unknown | yes | 1 year   | yes     | yes | as above but also to obtain a sponsor and when to contact, incentives                               | yes     | unknown | unknown |
| (51) | Lemstra, M. et al    | Patient Preference and Adherence                             | 2015 | CAN                                                                  | pre and post intervention  | obesity          | community           | adult              | patient, peers                          | social support contract                 | alter behavior, alter health indices          | components recommended by a guideline | unknown | yes | 24 weeks | unknown | yes | goals, barriers, solutions, how friends can help                                                    | unknown | yes     | unknown |
| (40) | Lievers, L.          | European Child and Adolescent Psychiatry                     | 2009 | FRANCE                                                               | retrospective chart review | anorexia nervosa | inpatient unit      | adolescent, female | patient, guardian, health care provider | therapeutic contract, weight contract   | care process (length of stay), alter behavior | unknown                               | unknown | yes | unknown  | unknown | yes | separation period, target discharge weight, end of separation weight                                | yes     | yes     | unknown |
| (69) | Lundervold, D. et al | International Journal of Behavioral Consultation and Therapy | 2008 | not stated (NS)- but guessing US since that's where authors are from | pre and post intervention  | fibromyalgia     | unknown             | 44yo female        | patient, health care provider           | behavioural contract                    | alter behavior/skills, alter health indices   | unknown                               | unknown | yes | 6 months | unknown | no  | commitment to practice skills, fill out a chronic daily pain record, mail weekly self recorded data | unknown | unknown | unknown |
| (24) | Magneberg, R.        | Addictive Behaviors                                          | 1998 | Sweden                                                               | case report                | alcohol          | community           | Adult              | patient, health care provider           | moral contract                          | alter behavior                                | unknown                               | unknown | yes | 1 year   | unknown | no  | commitment to carry out the project by a handshake                                                  | unknown | unknown | unknown |
| (59) | Mancuso C.A. et al   | Archives of Internal Medicine                                | 2012 | USA                                                                  | RCT                        | asthma           | primary care clinic | Adult              | patient, health care provider           | contract                                | alter behavior                                | unknown                               | unknown | yes | 1 year   | yes     | yes | commitment to prescribed activity                                                                   | unknown | unknown | unknown |

|      |                          |                                                      |      |                                                                   |                                             |                                      |                     |                         |                               |                                               |                                                                                                                                                  |          |         |     |           |         |         |                                                         |         |         |         |
|------|--------------------------|------------------------------------------------------|------|-------------------------------------------------------------------|---------------------------------------------|--------------------------------------|---------------------|-------------------------|-------------------------------|-----------------------------------------------|--------------------------------------------------------------------------------------------------------------------------------------------------|----------|---------|-----|-----------|---------|---------|---------------------------------------------------------|---------|---------|---------|
| (60) | Mancuso C.A. et al       | Annals of Allergy, Asthma and Immunology             | 2010 | USA                                                               | RCT                                         | asthma                               | primary care clinic | Adult                   | patient, health care provider | contract                                      | alter behavior, alter health indices                                                                                                             | workbook | unknown | yes | 2 years   | unknown | yes     | commitment to activity to improve asthma                | unknown | unknown | unknown |
| (41) | MartinezTaboas, A. et al | Dissociation: Progress in the Dissociative Disorders | 1997 | Puerto Rico                                                       | case report                                 | dissociative identity disorder (DID) | community           | 28yo female             | patient, health care provider | contract                                      | alter behavior                                                                                                                                   | unknown  | unknown | yes | 1 year    | unknown | no      | commitment to not hurt body, therapist responsibilities | unknown | unknown | unknown |
| (25) | Masson, S. et al         | Transplant International                             | 2014 | UK                                                                | non-randomized historical cohort comparison | alcoholic liver disease (ALD)        | outpatient clinic   | adult                   | patient, health care provider | alcohol contract                              | alter behavior, alter health indices                                                                                                             | unknown  | unknown | yes | unknown   | unknown | no      | commitment by alters to not hurt other                  | unknown | unknown | unknown |
| (42) | Mishara, B. et al        | American Journal of Community Psychology             | 1997 | Canada                                                            | retrospective observational study           | suicidal                             | call center         | Unknown                 | patient, health care provider | contract                                      | alter behavior, alter health indices                                                                                                             | unknown  | yes     | yes | unknown   | unknown | no      | commitment to not commit suicide and to follow-up       | unknown | unknown | unknown |
| (43) | Moljord, I.E.O. et al    | Patient education and counseling                     | 2017 | Norway                                                            | RCT                                         | psychiatric disorders                | community           | adult                   | patient, health care provider | self-referral to inpatient treatment contract | alter behavior, alter beliefs (confidence), support rights to self-determination, promote user participation in decision-making in own treatment | unknown  | unknown | yes | 1 year    | unknown | unknown | unknown                                                 | unknown | unknown | unknown |
| (26) | O'Farrell, T.J. et al    | Journal of studies on alcohol                        | 1998 | NS but I'm guessing the U.S b/c that's where the authors are from | RCT                                         | alcohol                              | primary care clinic | married, male, adult    | unknown                       | antabuse contract                             | alter behavior, interpersonal (marriage)                                                                                                         | unknown  | unknown | yes | 30 months | unknown | no      | patient and spouse responsibilities                     | unknown | unknown | unknown |
| (63) | Ogedegbe, G.O. et al     | Archives of Internal Medicine                        | 2012 | USA                                                               | RCT                                         | hypertension                         | primary care clinic | African American, adult | patient, health care provider | behavioural contract                          | alter beliefs (commitment), alter behavior, alter health indices                                                                                 | unknown  | unknown | yes | 1 year    | unknown | no      | commitment to take meds as prescribed                   | unknown | unknown | unknown |



|      |                        |                                                    |      |                                                                   |                                             |                              |                     |                          |                                         |                      |                                                                               |                  |         |     |         |         |     |                                                                                                                                                          |         |         |                         |
|------|------------------------|----------------------------------------------------|------|-------------------------------------------------------------------|---------------------------------------------|------------------------------|---------------------|--------------------------|-----------------------------------------|----------------------|-------------------------------------------------------------------------------|------------------|---------|-----|---------|---------|-----|----------------------------------------------------------------------------------------------------------------------------------------------------------|---------|---------|-------------------------|
| (64) | Ostfeld, R.J. et al    | International journal of cardiology                | 2007 | NS but I'm guessing the U.S b/c that's where the authors are from | non-randomized historical cohort comparison | cardiovascular disease       | outpatient clinic   | adult                    | patient, health care provider           | weight loss contract | alter behavior, alter health indices                                          | unknown          | unknown | yes | unknown | unknown | no  | commitment to rate of weight loss                                                                                                                        | unknown | unknown | unknown                 |
| (65) | Peterson, J.C. et al   | Archives of Internal Medicine                      | 2012 | USA                                                               | RCT                                         | coronary artery disease      | outpatient clinic   | adult                    | patient, health care provider           | behavioural contract | alter behavior, alter health indices                                          | unknown          | unknown | yes | 1 year  | unknown | yes | commitment to self-selected physical activity                                                                                                            | unknown | unknown | unknown                 |
| (27) | Piotrowski, N.A. et al | Experimental and clinical psychopharmacology       | 1999 | USA                                                               | RCT                                         | opioid                       | primary care clinic | adult                    | patient, health care provider           | contingency contract | alter behavior, alter health indices, interpersonal (family)                  | unknown          | unknown | yes | unknown | unknown | no  | commitment to abstinence                                                                                                                                 | yes     | unknown | unknown                 |
| (28) | Resnicow, K. et al     | Preventive medicine                                | 1997 | USA                                                               | RCT                                         | tobacco                      | community           | African Americans, adult | patient                                 | quit contract        | alter behavior                                                                | unknown          | unknown | yes | 6 month | unknown | yes | patient-selected quit date                                                                                                                               | yes     | yes     | unknown                 |
| (80) | Sagawa, M. et al       | International journal of nursing studies           | 2003 | Japan                                                             | pre and post intervention                   | chronic haemodialysis (HD)   | outpatient clinic   | adult                    | patient, health care provider           | self-contracting     | alter behavior, care process (clarify objectives), alter beliefs (commitment) | unknown          | unknown | yes | 4 weeks | unknown | yes | specific behaviours, commitment to plan, fluid intake objectives, reinforcers when successful                                                            | yes     | yes     | unknown                 |
| (81) | Schlenk, E.A. et al    | Applied Nursing Research : ANR                     | 1998 | USA                                                               | RCT                                         | diabetes                     | outpatient clinic   | adult                    | patient, health care provider           | contingency contract | alter behavior, alter health indices                                          | behavioral model | yes     | yes | unknown | unknown | yes | behavior to be performed                                                                                                                                 | yes     | yes     | social cognitive theory |
| (76) | Shaw, S.E. et al       | Journal of Rehabilitation Research and Development | 2005 | USA                                                               | pre and post intervention                   | traumatic brain injury (TBI) | outpatient clinic   | adult                    | patient, health care provider           | behavioral contract  | alter behavior, alter health indices                                          | unknown          | unknown | yes | 2 years | unknown | yes | activities the participant should perform, activities for which the mitt could be removed                                                                | unknown | unknown | unknown                 |
| (61) | Sherman, J.M. et al    | Clinical pediatrics                                | 2001 | USA                                                               | pre and post intervention                   | asthma                       | outpatient clinic   | children                 | patient, guardian, health care provider | behavioral contract  | alter behavior, care process (use of acute resources)                         | unknown          | unknown | yes | 1 year  | unknown | no  | acknowledgment of poor control and adherence, prescription, guardian and patient behaviors, action plan, responsibilities of treating team, consequences | unknown | unknown | unknown                 |

|      |                         |                                               |      |                 |                           |                                          |                     |            |                                         |                               |                                                                 |                   |         |     |           |         |     |                                                                      |         |         |                                    |
|------|-------------------------|-----------------------------------------------|------|-----------------|---------------------------|------------------------------------------|---------------------|------------|-----------------------------------------|-------------------------------|-----------------------------------------------------------------|-------------------|---------|-----|-----------|---------|-----|----------------------------------------------------------------------|---------|---------|------------------------------------|
| (44) | Sibley, M.H. et al      | Journal of consulting and clinical psychology | 2016 | USA             | RCT                       | attention deficit hyperactivity disorder | school              | adolescent | patient, guardian, health care provider | parent-teen contract          | alter behavior                                                  | unknown           | yes     | yes | 6 months  | unknown | yes | monitoring plan                                                      | unknown | unknown | unknown                            |
| (29) | Stanger, C. et al       | Drug and Alcohol Dependence                   | 2009 | USA             | RCT                       | marijuana                                | outpatient clinic   | adolescent | patient, guardian                       | substance monitoring contract | alter behavior, interpersonal (parenting), alter health indices | unknown           | unknown | yes | 9 months  | yes     | yes | positive and negative consequences                                   | yes     | unknown | unknown                            |
| (45) | van der Voort, T. et al | The British Journal of Psychiatry             | 2015 | The Netherlands | RCT                       | bipolar disorder                         | outpatient clinic   | adult      | patient, health care provider           | contracting                   | alter behavior, alter health indices                            | unknown           | unknown | yes | 1 year    | unknown | yes | most important problems, treatment activities, treatment plan, goals | unknown | yes     | unknown                            |
| (30) | Vinson, D. et al        | Substance Abuse                               | 2000 | USA             | RCT                       | alcohol                                  | primary care clinic | adult      | patient, peer, health care provider     | behavioral contract           | alter behavior, alter health indices                            | previous research | unknown | yes | 1 year    | unknown | yes | chosen behaviors                                                     | unknown | yes     | unknown                            |
| (52) | Washington, W. et al    | Translational issues in psychological science | 2016 | USA             | RCT                       | sedentary                                | community           | adult      | patient, health care provider           | deposit contract              | alter behavior                                                  | unknown           | unknown | no  | 21 days   | unknown | no  | unknown                                                              | yes     | yes     | unknown                            |
| (31) | White, J. et al         | American Journal of Preventative Medicine     | 2013 | Thailand        | RCT                       | tobacco                                  | community           | adult      | patient, health care provider           | commitment contract           | alter behavior, care process (cost)                             | unknown           | unknown | yes | 14 months | unknown | no  | unknown                                                              | yes     | unknown | behavioral economic, peer pressure |
| (32) | Young, R. et al         | Journal of Substance Abuse Treatment          | 2011 | Australia       | pre and post intervention | alcohol                                  | outpatient clinic   | adult      | patient, health care provider           | contract                      | alter beliefs (expectancy, self-efficacy), alter behavior       | unknown           | unknown | yes | 12 weeks  | unknown | no  | committing to abstinence for duration of program                     | unknown | unknown | unknown                            |
